# Supplementary material for: Functional ecological traits in young and adult thalli of canopy-forming brown macroalga Gongolaria barbata (Phaeophyta) from a transitional water system
Source: PeerJ. 2024 Sep 12;12:e17959. doi: 10.7717/peerj.17959 (PMC11402337; doi:10.7717/peerj.17959)
Supplement: Supplemental Information 1 — All the measurements on the eco-physiological traits and western blot analyses on which graphs and tables were built. [file peerj-12-17959-s001.xlsx]

## Sheet: TDMC
ADULTS
Thallus	TDMC (g g-1 )
1	0.147
2	0.119
3	0.135
4	0.121
5	0.132
JUVENILES
Thallus	TDMC (g g-1)
1	0.129
2	0.092
3	0.08
4	0.109
5	0.102

## Sheet: Fluorescence
ADULTS
	PAR	ΦPSII	ETR	NPQ	Fv/Fm
n1	0	0.7	0	0	0.701
	125	0.334	17.5	0.275
	190	0.259	20.7	0.343
	285	0.197	23.6	0.491
	420	0.151	26.6	0.717
	625	0.121	31.8	1.005
	820	0.108	37.2	1.317
	1150	0.097	46.9	1.612
	1500	0.093	58.6	1.873
n2	0	0.563	0	0	0.563
	125	0.24	12.6	0.615
	190	0.205	16.4	0.63
	285	0.166	19.9	0.692
	420	0.137	24.2	0.812
	625	0.093	24.4	0.962
	820	0.084	28.9	1.138
	1150	0.072	34.8	1.333
	1500	0.071	44.7	1.532
n3	0	0.676	0	0	0.676
	125	0.243	12.8	0.556
	190	0.22	17.6	0.745
	285	0.18	21.5	1.009
	420	0.151	26.6	1.276
	625	0.102	26.8	1.592
	820	0.085	29.3	1.835
	1150	0.078	37.7	2.083
	1500	0.048	30.2	2.36
n4	0	0.534	0	0	0.534
	125	0.255	13.4	0.519
	190	0.215	17.2	0.686
	285	0.182	21.8	0.894
	420	0.157	27.7	1.105
	625	0.139	36.5	1.236
	820	0.082	28.2	1.403
	1150	0.077	37.2	1.477
	1500	0.078	49.1	1.516
JUVENILES
	PAR	ΦPSII	ETR	NPQ	Fv/Fm
n1	0	0.572	0	0	0.572
	125	0.297	15.6	0.161
	190	0.28	22.3	0.24
	285	0.233	27.9	0.38
	420	0.198	34.9	0.549
	625	0.153	40.2	0.808
	820	0.13	44.8	1.073
	1150	0.109	52.6	1.353
	1500	0.1	63	1.621
n2	0	0.629	0	0	0.629
	125	0.355	18.6	0.073
	190	0.307	24.5	0.138
	285	0.251	30	0.273
	420	0.206	36.3	0.571
	625	0.176	46.2	0.886
	820	0.144	49.6	1.188
	1150	0.135	65.2	1.429
	1500	0.113	71.2	1.623
n3	0	0.621	0	0	0.621
	125	0.303	15.9	0.204
	190	0.27	21.5	0.319
	285	0.232	27.8	0.502
	420	0.205	36.2	0.714
	625	0.152	39.9	0.966
	820	0.137	47.2	1.203
	1150	0.129	62.3	1.46
	1500	0.128	80.6	1.691
n4	0	0.625	0	0	0.625
	125	0.312	16.4	0.179
	190	0.277	22.1	0.326
	285	0.241	28.8	0.588
	420	0.215	37.9	0.951
	625	0.17	44.6	1.314
	820	0.151	52	1.62
	1150	0.133	64.2	1.9
	1500	0.117	73.7	2.175

## Sheet: Pigments
ADULTS					JUVENILES
Thallus	Replicates	Chl tot (µg g⁻¹ DW)	Car tot (µg g⁻¹ DW)		Thallus	Replicates	Chl tot (µg g⁻¹ DW)	Car tot (µg g⁻¹ DW)
1	1	623.27	191.19		1	1	403.21	136.29
	2	629.1	193.42			2	407.62	137.3
	3	638.11	196.14			3	413.38	139.08
2	4	681.4	174.54		2	4	414.71	96.48
	5	678.11	172.21			5	415.07	96.37
	6	676.01	172.05			6	412.03	97.11
3	7	706.45	208.22		3	7	328.02	96.44
	8	709.96	208.89			8	330.1	97.7
	9	715.85	210.14			9	334.25	98.38
4	10	521.55	143.34		4	10	335.21	109.85
	11	519.95	145.29			11	338.03	110.56
	12	513.95	146.74			12	342.27	111.15
5	13	514.63	117.21		5	13	208.94	56.07
	14	508.83	110.87			14	209.95	56.57
	15	511.61	107.76			15	213.66	56.99

## Sheet: Rubisco-D1
Rubisco (arbitrary units)	ADULTS	JUVENILES
	1.97	5.17
	2.54	3.53
	2.6	5.44
	3.01	4.08
	2.99	6.63
	3.37	4.82
D1 (arbitrary units)	ADULTS	JUVENILES
	1.52	1.35
	2.02	1.6
	1.5	1.34
	2.02	1.83
	1.69	1.14
	2.23	1.87

## Sheet: Antioxidants
ADULTS
Thallus	Replicates	Polyphenols (mg GAE g-1 DW )	Flavonoids (mg CAT g-1 FW)	Tannins (mg CAT g-1 FW )	DPPH(% inhibition)
1	1	3.61	6.92	52.61	67.63
	2	3.84	7.03	52.63	61.05
	3	3.92	7.13	62.65	59.61
2	4	3.55	6.46	52.12	65.45
	5	3.58	7.48	52.14	64.81
	6	3.62	7.93	52.16	61.27
3	7	3.63	5.85	57.33	65.6
	8	3.69	5.87	57.36	59.2
	9	3.84	5.93	57.38	62.26
4	10	3.06	5.65	43.33	56.85
	11	3.39	6.04	43.34	56.65
	12	3.01	6.17	43.34	59.96
5	13	3.33	6.27	59.9	64.01
	14	3.67	7.13	69.91	62.4
	15	3.72	6.62	69.92	59.17
JUVENILES
Thallus	Replicates	Polyphenols (mg GAE g-1 DW )	Flavonoids (mg CAT g-1 FW)	Tannins (mg CAT g-1 FW )	DPPH(% inhibition)
1	1	4.22	14.02	70	73.6
	2	4.55	15.32	70.03	72.43
	3	4.5	14.57	70.05	70.55
2	4	4.68	11.74	69.15	73.95
	5	4.89	12.91	69.2	74.07
	6	4.88	13.13	69.22	73.52
3	7	4.88	11.79	86.84	74.11
	8	5.11	12.47	86.85	73.47
	9	5.16	13.21	86.87	72.82
4	10	5.57	13.96	83.77	73.45
	11	5.68	16.22	83.77	73.63
	12	5.76	15.7	83.78	74.22
5	13	4.85	11.01	64.53	74.09
	14	4.81	11.59	64.56	73.58
	15	4.8	13.15	64.58	74.46
